# Supplementary material
Source: publisher site journal article supplement (https://www.dovepress.com/article/587505)
Supplement: Supplementary file 1 [file 587505_Supplementary%20Material.docx]

Supplemental Table 1 Patient characteristics and preoperative parameters in the internal validation set

| Variable | Non-shock group (n=100) | Shock group(n=36) | P value |
| --- | --- | --- | --- |
| Age (years) | 84.8 ± 7.6 | 84.8 ± 8.8 | 0.99 |
| Gender (n) |  |  | 0.363 |
| Male | 37 | 10 |  |
| Female | 63 | 26 |  |
| BMI(Kg/m2) | 21.6 ± 3.8 | 24.4 ± 5.0 | 0.01* |
| Fracture type (n) |  |  | 0.755 |
| Intertrochanteric | 53 | 18 |  |
| Subtrochanteric | 1 | 0 |  |
| Femoral neck | 46 | 18 |  |
| CCI | 2.6 ± 1.7 | 4.0 ± 2.4 | < 0.001* |
| APACHE II | 14.9 ± 3.8 | 16.9 ± 4.2 | 0.019* |
| ASA grade (n) |  |  | 0.467 |
| 1 | 0 | 0 |  |
| 2 | 28 | 8 |  |
| 3 | 61 | 26 |  |
| 4 | 11 | 2 |  |
| Time to surgery（days） | 7 (4, 23) | 7 (5, 12) | 0.562 |
| Surgical approach (n) |  |  | 0.287 |
| THA | 4 | 0 |  |
| Hemiarthroplasty | 37 | 17 |  |
| Internal fixation | 59 | 19 |  |
| Length of surgery (hours) | 1.0 (1.0, 1.5) | 1.0 (1.0, 1.5) | 0.795 |
| EBL (mL) | 200 (100, 200) | 200 (100, 200) | 0.724 |
| EF (%) | 64 (61, 67) | 64 (60, 67) | 0.734 |
| WBC (×103/μL) | 8.9 ± 2.6 | 8.3 ± 2.6 | 0.2 |
| HGB(g/L) | 104.2 ± 16.7 | 100.5 ± 18.2 | 0.275 |
| PLT (×103/μL) | 201.1 ± 67.7 | 208.3 ± 89.2 | 0.62 |
| ALB (g/L) | 37.0 ± 3.6 | 34.8 ± 4.5 | 0.005 |
| CREA (μmol/L) | 70 (58, 86.5) | 71 (52, 92) | 0.853 |
| Blood phosphates (mmol/L) | 0.94 ± 0.22 | 1.00 ± 0.23 | 0.141 |
| BNP(pg/mL) | 1184 (391, 2643) | 951 (579, 3166) | 0.43 |
| hsTnI (ng/L) | 15.3 (9.4, 30.8) | 13.6 (8.4, 22.6) | 0.43 |
| D-dimer (mg/L FEU) | 6.59 (2.88, 13.70) | 4.13 (2.05, 15.73) | 0.237 |
| Duration of ICU (hours） | 45 (21, 51) | 47 (42, 70） | 0.037 |
| Hospital length of stay (days) | 7 (5, 8) | 7 (6, 9) | 0.944 |

BMI, body mass index; CCI, Charlson Comorbidity Index; APACHE II, Acute Physiology and Chronic Health Evaluation II; ASA, American Society of Anesthesiologists Physical Status Classification; THA, total hip arthroplasty; EBL, estimated blood loss; EF, ejection fraction; WBC, white blood cell; Hgb, hemoglobin; PLT, platelet; ALB, albumin; CREA, creatinine. *, P < 0.05

Supplemental Table 2 Patient characteristics and preoperative parameters in the external validation set

| Variable | Non-shock group (n=217) | Shock group(n=70) | P value |
| --- | --- | --- | --- |
| Age (years) | 83.1 ± 7.4 | 83.5 ± 5.38 | 0.604 |
| Gender (n) |  |  | 0.934 |
| Male | 60 | 19 |  |
| Female | 157 | 51 |  |
| BMI(Kg/m2) | 22.3 ± 4.0 | 24.2 ± 4.1 | < 0.001* |
| Fracture type (n) |  |  | 0.11 |
| Intertrochanteric | 102 | 43 |  |
| Subtrochanteric | 5 | 1 |  |
| Femoral neck | 110 | 26 |  |
| CCI | 2.6 ± 1.7 | 3.5±2.1 | 0.003* |
| APACHE II | 15.3 ± 4.2 | 15.2 ± 3.8 | 0.831 |
| ASA grade (n) |  |  | 0.41 |
| 1 | 0 | 0 |  |
| 2 | 64 | 15 |  |
| 3 | 138 | 49 |  |
| 4 | 15 | 6 |  |
| Time to surgery（days） | 7 (4, 15) | 6 (4, 12) | 0.8 |
| Surgical approach (n) |  |  | 0.38 |
| THA | 8 | 1 |  |
| Hemiarthroplasty | 87 | 24 |  |
| Internal fixation | 122 | 45 |  |
| Length of surgery (hours) | 1.0 (1.0, 1.5) | 1.0 (1.0, 1.2) | 0.58 |
| EBL (mL) | 200 (195, 200) | 200 (100, 200) | 0.01* |
| EF (%) | 63 (61, 67) | 64 (62, 68) | 0.21 |
| WBC (×103/μL) | 9.2 ± 3.6 | 10.2 ± 4.2 | 0.084 |
| HGB(g/L) | 106.5 ± 18.0 | 101.7 ± 18.9 | 0.056 |
| PLT (×103/μL) | 204.5 ± 97.6 | 218.9 ± 132.1 | 0.327 |
| ALB (g/L) | 36.8 ± 3.8 | 30.1 ± 5.1 | < 0.001 |
| CREA (μmol/L) | 80 (62, 119) | 88 (71, 124) | 0.51 |
| Blood phosphates (mmol/L) | 1.2 ± 0.3 | 1.2 ± 0.4 | 0.952 |
| BNP(pg/mL) | 1064 (338, 2534) | 1515 (575, 2859) | 0.16 |
| hsTnI (ng/L) | 13.0 (7.1, 23.9) | 12.9 (8.3, 19.3) | 0.76 |
| D-dimer (mg/L FEU) | 4.71 (2.31, 12.90) | 5.61 (2.34, 13.50) | 0.77 |
| Duration of ICU (hours） | 35 (24, 45) | 37 (23, 48) | 0.60 |
| Hospital length of stay (days) | 6 (4, 8) | 6 (5, 9) | 0.17 |

BMI, body mass index; CCI, Charlson Comorbidity Index; APACHE II, Acute Physiology and Chronic Health Evaluation II; ASA, American Society of Anesthesiologists Physical Status Classification; THA, total hip arthroplasty; EBL, estimated blood loss; EF, ejection fraction; WBC, white blood cell; Hgb, hemoglobin; PLT, platelet; ALB, albumin; CREA, creatinine.*, P < 0.05
